# Supplementary material for: Super-resolution imaging of RAD51 and DMC1 in DNA repair foci reveals dynamic distribution patterns in meiotic prophase
Source: PLoS Genet. 2020 Jun 5;16(6):e1008595. doi: 10.1371/journal.pgen.1008595 (PMC7310863; doi:10.1371/journal.pgen.1008595)
Supplement: S2 Table — (XLSX) [file pgen.1008595.s007.xlsx]

## Sheet: Figure 1 + Sup Figure 1
Kolmogornov Smirnov test for figure 1 (B+D)
			leptotene		zygotene
			D	P	D	P
		DMC1-RAD51	0.476	< 2.2 E-16	0.487	< 2.2 E-16
		RAD51-RAD51	0.153	1.1e-09	0.191	7.2e-10
		DMC1-DMC1	0.109	0.00018	0.17	2.8e-08
Kolmogornov Smirnov test for suplementary figure 1 (B+C)
			leptotene		zygotene
			D	P	D	P
		DMC1-RAD51	0.512	< 2.2 E-16	0.62	< 2.2 E-16
		RAD51-RAD51	0.113	5.42e-06	0.239	2.22e-16
		DMC1-DMC1	0.193	< 2.2 E-16	0.332	< 2.2 E-16

## Sheet: Figure 2
Related to Figure 2G
Supplemental statistics comparing the fractions of foci with more than 1 DMC1 or RAD51 cluster
Fractions >1 D or R
WT	DMC1	RAD51		SYCP1 KO	DMC1	RAD51
mean	0.408517	0.257153			0.424762	0.346648
sd	0.21335	0.110156			0.103553	0.107987
sem	0.0489458	0.0252715			0.0327465	0.0341485
DMC1>1 vs RAD51>1				DMC1>1 vs RAD51>1
p value two sided t-test	0.01056			p value two sided t-test	0.1161
RAD51>1(WT) vs RAD51>1 (SYCP1 KO)
p value two sided t-test		0.04886

## Sheet: Figure 4
P-values two sided t-test
Fig 4A - wildtype - average number of foci
11						21						12
	Lepto	EZ	LZ	Pach			Lepto	EZ	LZ	Pach			Lepto	EZ	LZ	Pach
Lepto		0.33	0.055	0.028		Lepto		0.012	0.41	0.71		Lepto		0.21	0.62	0.091
EZ			0.07	0.02		EZ			0.061	0.01		EZ			0.18	0.013
LZ				0.41		LZ				0.299		LZ				0.4479
Pach						Pach						Pach
4C - wildtype - Fraction
11						21						12
	Lepto	EZ	LZ	Pach			Lepto	EZ	LZ	Pach			Lepto	EZ	LZ	Pach
Lepto		0.012	0.03396	0.1924		Lepto		0.1205	0.2879	0.389		Lepto		0.4239	0.94	0.6519
EZ			0.2364	0.444		EZ			0.592	0.75		EZ			0.82	0.98
LZ				0.8116		LZ				0.9687		LZ				0.83
Pach						Pach						Pach
4B - SYCP1 KO - average number of foci
11					21					12
	Lepto	EZ	Pach			Lepto	EZ	Pach			Lepto	EZ	Pach
Lepto		0.1646	0.87		Lepto		0.3727	0.4827		Lepto		0.3571	0.1719
EZ			0.01723		EZ			0.46		EZ			0.06197
Pach					Pach					Pach
4D - SYCP1KO - Fraction
11					21					12
	Lepto	EZ	Pach			Lepto	EZ	Pach			Lepto	EZ	Pach
Lepto		0.09937	0.5708		Lepto		0.1609	0.0278		Lepto		0.5515	0.3007
EZ			0.06804		EZ			0.1166		EZ			0.1831
Pach					Pach					Pach
Two sided paired t-test
4E Unsynapsed vs Synapsed
	D1R1	D2R1	D1R2
all	0.017	0.8938	0.037

## Sheet: Figure 5
P-values two sided t-test
Figure 5C												p-values
D1R1													WT							Sycp1 --/--			Legend
		WT L	WT EZ	WT LZ	WT P	SYCP1KO L	SYCP1KO EZ	SYCP1KO P		D1R1													p<0.05
mean area	DMC1	47516.8	41260.4	31181.7	48371.4	61019.6	73244.8	65248.7			DMC1		L	EZ	LZ	P			L	EZ	P		p<0.005
	RAD51	30496.7	19473.5	31122.2	32517.8	37449.6	37501.8	42899.2				L	1	0.00032	0.00032	0.70313		L	1	0.00081	0.0236
												EZ	0.00032	1	0.272843	0.00363		EZ	0.00081	1	0.02711
sd	DMC1	19850.3	23153.4	18154.1	22306.5	20881.1	30684.7	27440.8				LZ	0.00032	0.272843	1	0.191763		P	0.0236	0.02711	1
	RAD51	13913.2	12739	19662	15002.3	12873.4	24865.1	21848.4				P	0.70313	0.00363	0.191763	1
sem	DMC1	1031.97	1383.68	1562.46	1987.22	1290.04	3308.81	1345.4			R51		L	EZ	LZ	P			L	EZ	P
	RAD51	723.313	761.303	1692.23	1336.51	795.324	2681.28	1071.2				L	1	2e-16	0.73	0.19		L	1	0.985	4.9e-05
												EZ	2e-16	1	2.3e-09	4e-15		EZ	0.985	1	0.064
	n	370	280	135	126	262	86	416				LZ	0.73	2.3e-09	1	0.52		P	4.9e-05	0.064	1
												P	0.19	4e-15	0.52	1
Figure 5D
D2R1										D2R1
		WT L	WT EZ	WT LZ	WT P	SYCP1KO L	SYCP1KO EZ	SYCP1KO P			Close		L	EZ	LZ	P			L	EZ	P
mean area	DMC1 close	39670.5	39425.6	25137.5	30730.2	54058.4	57185.7	57758.9				L	1	0.935	1.2e-05	0.03		L	1	0.51	0.2
	DMC1 far	5460.82	6731.43	7155.63	10023.7	6143.51	10952	7081.4				EZ	0.935	1	4.2e-09	0.013		EZ	0.51	1	0.9
	RAD51	28276.9	18654.4	33239	37095.3	34134.9	34627.4	39627.6				LZ	1.2e-05	4.2e-09	1	0.121		P	0.2	0.9	1
												P	0.03	0.013	0.121	1
sd	DMC1 close	21543.2	21067.3	16031.3	23534.2	22742.3	33656	27898.4
	DMC1 far	3368.63	6720.03	5590.27	12299.1	5622.89	14147.6	9642.91
	RAD51	12395.1	12902.6	18657.4	20592.5	13601.5	20659	20964.5			Far		L	EZ	LZ	P			L	EZ	P
												L	1	0.043	0.025	0.008		L	1	0.011	0.29
sem	DMC1 close	2631.92	1467.83	1792.36	3090.2	1987	4240.25	2133.44				EZ	0.043	1	0.588	0.054		EZ	0.011	1	0.048
	DMC1 far	411.543	468.207	625.011	1614.96	491.275	1782.44	737.412				LZ	0.025	0.588	1	0.102		P	0.29	0.048	1
	RAD51	1514.3	898.967	2085.96	2703.93	1188.37	2602.79	1603.19				P	0.008	0.054	0.102	1
	n	67	206	80	58	131	63	171			R51		L	EZ	LZ	P			L	EZ	P
												L	1	2.7e-07	0.0563	0.0055		L	1	0.8637	0.0062
												EZ	2.7e-07	1	3.6e-09	1.1e-08		EZ	0.8637	1	0.1044
												LZ	0.0563	3.6e-09	1	0.2612		P	0.0062	0.1044	1
												P	0.0055	1.1e-08	0.2612	1
Figure 5E
D1R2
		WT L	WT EZ	WT LZ	WT P	SYCP1KO L	SYCP1KO EZ	SYCP1KO P		D1R2
mean area	RAD51 close	5339.29	6656.63	7412.22	6605.71	8345.4	12663.2	8140.2			Close		L	EZ	LZ	P			L	EZ	P
	RAD51 far	25643.6	17333.7	28713.9	20695.7	33681.9	27074.3	37247				L	1	0.172259	0.0583578	0.259191		L	1	0.0988985	0.88541
	DMC1	48931.8	47402	40891.1	48632.1	66399.3	79719.1	67782.9				EZ	0.172259	1	0.487272	0.963715		EZ	0.0988985	1	0.055386
												LZ	0.0583578	0.487272	1	0.511029		P	0.88541	0.055386	1
sd	RAD51 close	5671.07	6741.43	5655.23	5227.99	11359.1	13711.8	7500.83				P	0.259191	0.963715	0.511029
	RAD51 far	11501.1	13064.4	22245	14284	17488.7	19362.6	21969.8
	DMC1	16955.5	24625.7	21891.8	26159.2	28084	29557.1	28480.7
											Far		L	EZ	LZ	P			L	EZ	P
sem	RAD51 close	677.822	680.987	843.031	883.691	1302.97	2224.34	565.396				L	1	2.32124e-05	0.395823	0.0802917		L	1	0.080739	0.172267
	RAD51 far	1374.64	1319.7	3316.09	2414.43	2006.09	3141.03	1656.04				EZ	2.32124e-05	1	0.00229919	0.226912		EZ	0.080739	1	0.00575796
	DMC1	2026.57	2487.57	3263.43	4421.72	3221.46	4794.79	2146.81				LZ	0.395823	0.00229919	1	0.0543154		P	0.172267	0.00575796	1
												P	0.0802917	0.226912	0.0543154	1
	n	70	98	45	35	76	38	176
											DMC1		L	EZ	LZ	P			L	EZ	P
												L	1	0.634155	0.0396246	0.95113		L	1	0.0240505	0.72131
												EZ	0.634155	1	0.115888	0.809295		EZ	0.0240505	1	0.0271776
												LZ	0.0396246	0.115888	1	0.163651		P	0.72131	0.0271776	1
												P	0.95113	0.809295	0.163651	1

## Sheet: Figure 6
Figure 6B
	P values from Mann Whitney U test
	all
			dmc1	rad
		dmc1		0.001158
		rad	0.001158
	d1r1
			dmc1	rad
		dmc1		0.2148
		rad	0.2148
	d1r2
			dmc1	rad	radfar
		dmc1		0.9595	0.9638
		rad	0.9595		0.9725
		radfar	0.9638	0.9725
	d2r1
			dmc1	rad	dmc1far
		dmc1		0.2368	0.1023
		rad	0.2368		0.0075
		dmc1far	0.1023	0.0075

## Sheet: Figure 7
	p-values two side t-test												Legend
	WT							Sycp1 --/--					p<0.05
Figure 7C	distance D1R1 R-D												p<0.005
		L	EZ	LZ	P				L	EZ	P
	L	1	1.62553e-11	9.78203e-06	1.91364e-09			L	1	0.00354715	0.497154
	EZ	1.62553e-11	1	0.272843	0.745799			EZ	0.00354715	1	0.0124219
	LZ	9.78203e-06	0.272843	1	0.191763			P	0.497154	0.0124219	1
	P	1.91364e-09	0.745799	0.191763	1
Figure 7D	short distance D2R1 R-D							short distance D2R1 R-D
		L	EZ	LZ	P				L	EZ	P
	L	1	0.028056	0.197076	4.70033e-06			L	1	0.358736	0.856159
	EZ	0.028056	1	0.366759	0.00049727			EZ	0.358736	1	0.411475
	LZ	0.197076	0.366759	1	0.000101157			P	0.856159	0.411475	1
	P	4.70033e-06	0.00049727	0.000101157	1
Figure 7E	long distance D2R1 R-D							long distance D2R1 R-D
		L	EZ	LZ	P				L	EZ	P
	L	1	0.401393	0.00511905	0.951352			L	1	0.358736	0.856159
	EZ	0.401393	1	0.0098627	0.447958			EZ	0.358736	1	0.411475
	LZ	0.00511905	0.0098627	1	0.00658484			P	0.856159	0.411475	1
	P	0.951352	0.447958	0.00658484	1
Figure 7F	long distance D2R1 D-D							long distance D2R1 D-D
		L	EZ	LZ	P				L	EZ	P
	L	1	0.160454	0.0117666	0.477535			L	1	0.769159	0.729295
	EZ	0.160454	1	0.0656378	0.578413			EZ	0.769159	1	0.954178
	LZ	0.0117666	0.0656378	1	0.0649687			P	0.729295	0.954178	1
	P	0.477535	0.578413	0.0649687	1

## Sheet: Figure 8
	p-values two sided t-test												Legend
	WT							Sycp1 --/--					p<0.05
													p<0.005
Figure 8C	short distance D1R2 D-R							short distance D2R1 R-D
		L	EZ	LZ	P				L	EZ	P
	L	1	0.0235236	0.0179662	0.0360903			L	1	0.0458839	0.381485
	EZ	0.0235236	1	0.533971	0.516934			EZ	0.0458839	1	0.00764347
	LZ	0.0179662	0.533971	1	0.887535			P	0.381485	0.00764347	1
	P	0.0360903	0.516934	0.887535	1
Figure 8D	long distance D1R2 D-R							long distance D2R1 R-D
		L	EZ	LZ	P				L	EZ	P
	L	1	0.0535424	0.808976	0.791799			L	1	0.6878	0.252939
	EZ	0.0535424	1	0.0796071	0.282928			EZ	0.6878	1	0.607464
	LZ	0.808976	0.0796071	1	0.666774			P	0.252939	0.607464	1
	P	0.791799	0.282928	0.666774	1
Figure 8E	long distance D2R1 R-R							long distance D2R1 D-D
		L	EZ	LZ	P				L	EZ	P
	L	1	0.699161	0.304186	0.98633			L	1	0.165277	0.70809
	EZ	0.699161	1	0.139887	0.754894			EZ	0.165277	1	0.196072
	LZ	0.304186	0.139887	1	0.412986			P	0.70809	0.196072	1
	P	0.98633	0.754894	0.412986	1
